# Supplementary material for: Identification of QTLs and Putative Candidate Genes for Plant Architecture of Lotus Revealed by Regional Association Mapping
Source: MDPI journal article supplement (doi:10.3390/plants12061221), 2023-03-08
Supplement: s1 [file s1]

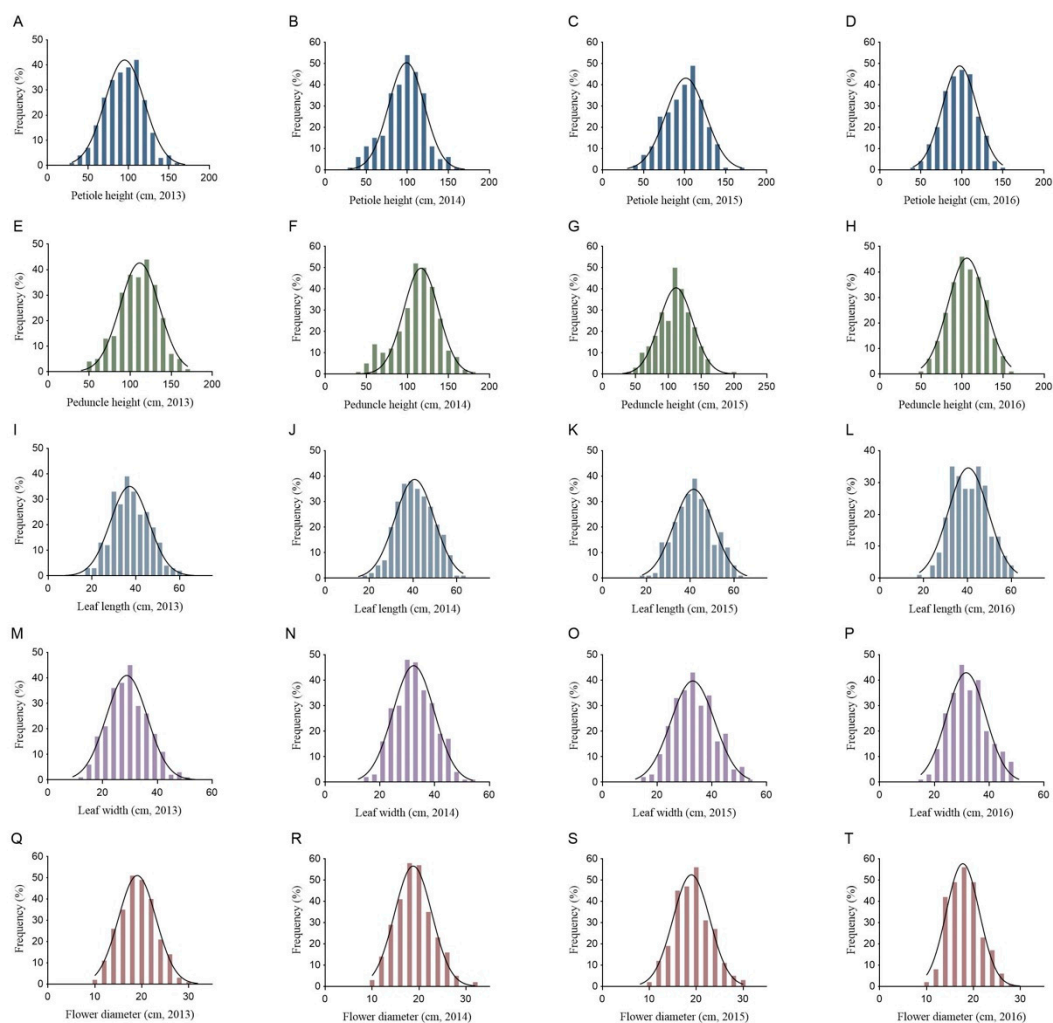

Figure S1 The distribution of accessions with the indicated level of petiole height (A-D), peduncle height (E-H), leaf length (I-L), leaf width (M-P), and flower diameter (Q-T). The values of each trait were evaluated in 293 lotus accessions in 2013, 2014, 2015 and 2016.
